# Supplementary material for: Does a halogen bond require positive potential on the acid and negative potential on the base?
Source: Royal Society of Chemistry journal article supplement (doi:10.1039/d3cp00379e), 2023-01-01
Supplement: d3cp00379e1.pdf [file d3cp00379e1.pdf]

## Supplementary Information

### Does a Halogen Bond Require Positive Potential on the Acid and Negative Potential on the Base?

Steve Scheiner\*

Department of Chemistry and Biochemistry  
Utah State University  
Logan, Utah 84322-0300

email: [steve.scheiner@usu.edu](mailto:steve.scheiner@usu.edu)

#### Table of contents:

**Tables S1-S3.** SAPT decompositions of various complexes.

**Table S4.** Cartesian coordinates of complexes.

Table S1. SAPT decomposition of the interaction energy of each base with ICCH; all in kcal/mol.

|                     | ES    | EX   | IND   | DISP  | TOT   | %ES <sup>a</sup> |
|---------------------|-------|------|-------|-------|-------|------------------|
| Me <sub>2</sub> CS  | -4.74 | 8.28 | -2.08 | -5.90 | -4.44 | 37.3             |
| Me <sub>2</sub> CTe | -5.27 | 9.64 | -2.53 | -6.80 | -4.96 | 36.1             |

<sup>a</sup>ES/(ES+IND+DISP)

Table S2. SAPT decomposition of the interaction energy of each base with ICCH; all in kcal/mol.

|                                  | ES     | EX    | IND   | DISP  | TOT   | %ES  |
|----------------------------------|--------|-------|-------|-------|-------|------|
| NH <sub>3</sub>                  | -11.49 | 11.96 | -3.66 | -3.62 | -6.82 | 61.2 |
| NCF                              | -5.18  | 5.42  | -1.60 | -2.90 | -4.23 | 53.5 |
| NCNO <sub>2</sub>                | -3.27  | 3.95  | -1.00 | -2.55 | -2.88 | 47.9 |
| NF <sub>3</sub>                  | -1.51  | 3.08  | -0.61 | -2.04 | -1.09 | 36.3 |
| N(NO <sub>2</sub> ) <sub>3</sub> | -0.94  | 4.43  | -0.82 | -4.41 | -1.74 | 15.2 |
| PF <sub>3</sub>                  | -2.51  | 4.81  | -1.20 | -2.46 | -1.36 | 40.7 |

Table S3. SAPT decomposition of the interaction energy of each Lewis acid with NH<sub>3</sub>; all in kcal/mol.

|  | ES | EX | IND | DISP | TOT | %ES |
|--|----|----|-----|------|-----|-----|
|--|----|----|-----|------|-----|-----|

|                                   |       |      |       |       |       |      |
|-----------------------------------|-------|------|-------|-------|-------|------|
| GeH <sub>3</sub> I                | -3.65 | 5.69 | -1.36 | -2.18 | -1.50 | 50.8 |
| GeH <sub>3</sub> Br               | -1.07 | 2.91 | -0.66 | -1.34 | -0.17 | 34.9 |
| C <sub>6</sub> Me <sub>5</sub> Br | -3.00 | 5.29 | -1.13 | -2.07 | -0.91 | 48.4 |
| C <sub>6</sub> Me <sub>5</sub> Cl | -1.42 | 3.71 | -0.88 | -1.60 | -0.19 | 36.4 |

Table S4. CARTESIAN COORDINATES OF COMPLEXES

**COMPLEXES WITH ICCH**

C<sub>2</sub>H<sub>2</sub>

|    |              |              |              |
|----|--------------|--------------|--------------|
| 6  | -3.331468000 | 0.000017000  | 0.000546000  |
| 6  | -2.132459000 | -0.000004000 | 0.000291000  |
| 53 | -0.138727000 | -0.000020000 | -0.000207000 |
| 1  | -4.395498000 | 0.000074000  | 0.000768000  |
| 6  | 3.180049000  | -0.597830000 | 0.000370000  |
| 6  | 3.179775000  | 0.597957000  | 0.000371000  |
| 1  | 3.185917000  | 1.662701000  | 0.000370000  |
| 1  | 3.186757000  | -1.662571000 | 0.000372000  |

C<sub>2</sub>F<sub>2</sub>

|    |              |              |              |
|----|--------------|--------------|--------------|
| 6  | -3.863985000 | -0.000141000 | -0.000524000 |
| 6  | -2.665415000 | -0.000020000 | -0.000267000 |
| 53 | -0.675576000 | 0.000151000  | 0.000196000  |
| 1  | -4.928100000 | -0.000265000 | -0.000743000 |
| 6  | 2.660747000  | 0.590951000  | -0.000154000 |
| 6  | 2.660657000  | -0.591490000 | -0.000171000 |
| 9  | 2.665103000  | -1.871027000 | -0.000162000 |
| 9  | 2.666186000  | 1.870632000  | -0.000166000 |

C<sub>2</sub>H<sub>4</sub>

|    |              |              |              |
|----|--------------|--------------|--------------|
| 6  | -3.410102000 | 0.000734000  | 0.000097000  |
| 6  | -2.211025000 | 0.000375000  | -0.000022000 |
| 53 | -0.215587000 | -0.000307000 | -0.000025000 |
| 1  | -4.474143000 | 0.001093000  | 0.000157000  |
| 6  | 3.101481000  | -0.661909000 | 0.000044000  |
| 1  | 3.103742000  | -1.229275000 | -0.922672000 |
| 1  | 3.103708000  | -1.229265000 | 0.922769000  |
| 6  | 3.100903000  | 0.662968000  | 0.000043000  |
| 1  | 3.102643000  | 1.230338000  | -0.922673000 |
| 1  | 3.102605000  | 1.230353000  | 0.922755000  |

C<sub>2</sub>F<sub>4</sub>

|    |              |              |              |
|----|--------------|--------------|--------------|
| 6  | -4.296375000 | 0.000249000  | 0.000211000  |
| 6  | -3.098079000 | 0.000102000  | 0.000083000  |
| 53 | -1.110507000 | -0.000123000 | -0.000154000 |
| 1  | -5.360555000 | 0.000368000  | 0.000340000  |
| 6  | 2.260573000  | -0.659578000 | 0.000062000  |
| 9  | 2.263193000  | -1.378539000 | -1.094798000 |
| 9  | 2.262476000  | -1.378540000 | 1.095009000  |
| 6  | 2.260465000  | 0.659760000  | 0.000149000  |
| 9  | 2.262959000  | 1.378793000  | -1.094726000 |
| 9  | 2.262250000  | 1.378616000  | 1.095051000  |

C<sub>6</sub>H<sub>6</sub>

|    |              |              |              |
|----|--------------|--------------|--------------|
| 6  | -4.126278000 | 0.572394000  | -0.005497000 |
| 6  | -2.959972000 | 0.293703000  | -0.003384000 |
| 53 | -1.023421000 | -0.170292000 | 0.000695000  |
| 1  | -5.161026000 | 0.819854000  | -0.007268000 |
| 6  | 2.596065000  | 1.286826000  | -0.649896000 |
| 6  | 2.440496000  | 0.121172000  | -1.387814000 |
| 6  | 2.582571000  | 1.238013000  | 0.738112000  |
| 1  | 2.445504000  | 0.159686000  | -2.469352000 |
| 1  | 2.698612000  | 2.147716000  | 1.312680000  |
| 6  | 2.272063000  | -1.095446000 | -0.737561000 |
| 6  | 2.413573000  | 0.023399000  | 1.389020000  |
| 1  | 2.148455000  | -2.004332000 | -1.312445000 |
| 1  | 2.397787000  | -0.014328000 | 2.470498000  |
| 6  | 2.258840000  | -1.144433000 | 0.651550000  |
| 1  | 2.125194000  | -2.091535000 | 1.158538000  |
| 1  | 2.722616000  | 2.234637000  | -1.156654000 |

C<sub>6</sub>F<sub>6</sub>

|    |              |              |              |
|----|--------------|--------------|--------------|
| 6  | 4.755384000  | -1.002244000 | -0.009235000 |
| 6  | 3.641899000  | -0.559973000 | -0.005713000 |
| 53 | 1.795242000  | 0.171382000  | 0.000094000  |
| 1  | 5.744661000  | -1.394547000 | -0.012166000 |
| 6  | -1.881291000 | -1.232776000 | -0.558172000 |
| 6  | -1.711110000 | -0.128783000 | -1.376622000 |
| 6  | -1.854752000 | -1.085819000 | 0.819298000  |
| 9  | -1.728889000 | -0.269506000 | -2.691115000 |
| 9  | -2.011217000 | -2.141553000 | 1.599628000  |

|   |              |              |              |
|---|--------------|--------------|--------------|
| 6 | -1.515067000 | 1.124112000  | -0.817593000 |
| 6 | -1.657945000 | 0.165458000  | 1.378948000  |
| 9 | -1.346075000 | 2.178773000  | -1.598322000 |
| 9 | -1.624032000 | 0.305825000  | 2.693293000  |
| 6 | -1.488751000 | 1.271425000  | 0.560636000  |
| 9 | -1.295495000 | 2.466606000  | 1.094422000  |
| 9 | -2.063482000 | -2.428712000 | -1.091474000 |

Me<sub>2</sub>CS

|    |              |              |              |
|----|--------------|--------------|--------------|
| 16 | -2.427266000 | 1.223437000  | 0.001273000  |
| 6  | -2.450829000 | -0.396624000 | 0.000696000  |
| 6  | -2.454717000 | -1.204893000 | 1.261982000  |
| 1  | -1.585103000 | -1.868674000 | 1.270247000  |
| 1  | -2.439505000 | -0.573009000 | 2.144894000  |
| 1  | -3.339594000 | -1.847359000 | 1.282496000  |
| 6  | -2.464598000 | -1.203814000 | -1.261205000 |
| 1  | -1.600153000 | -1.874151000 | -1.273405000 |
| 1  | -3.354390000 | -1.839608000 | -1.278739000 |
| 1  | -2.448730000 | -0.571333000 | -2.143672000 |
| 6  | 4.020817000  | -0.691665000 | -0.000633000 |
| 6  | 2.874684000  | -0.339868000 | -0.000569000 |
| 53 | 0.970055000  | 0.245702000  | -0.000436000 |
| 1  | 5.038685000  | -1.001864000 | -0.000687000 |

Me<sub>2</sub>CTe

|    |              |              |              |
|----|--------------|--------------|--------------|
| 52 | -2.149544000 | -0.662371000 | 0.000391000  |
| 6  | -1.562080000 | 1.224458000  | 0.000920000  |
| 6  | -1.319479000 | 1.992676000  | 1.256875000  |
| 1  | -1.980891000 | 2.865808000  | 1.279616000  |
| 1  | -1.476857000 | 1.397811000  | 2.151273000  |
| 1  | -0.295737000 | 2.382700000  | 1.253698000  |
| 6  | -1.329904000 | 1.996581000  | -1.254584000 |
| 1  | -1.989559000 | 2.871232000  | -1.268104000 |
| 1  | -0.305382000 | 2.384586000  | -1.259596000 |
| 1  | -1.496777000 | 1.405186000  | -2.149549000 |
| 6  | 4.835074000  | 0.111791000  | 0.000974000  |
| 6  | 3.642144000  | -0.008308000 | 0.000130000  |
| 53 | 1.657226000  | -0.207245000 | -0.001042000 |
| 1  | 5.893996000  | 0.216724000  | 0.001700000  |

NH<sub>3</sub>

|    |              |              |              |
|----|--------------|--------------|--------------|
| 7  | 3.038936000  | -0.000349000 | -0.001195000 |
| 1  | 3.402855000  | -0.144792000 | -0.935546000 |
| 1  | 3.408580000  | -0.736487000 | 0.588497000  |
| 1  | 3.408858000  | 0.879326000  | 0.338835000  |
| 6  | -3.144728000 | -0.000428000 | -0.001515000 |
| 6  | -1.944685000 | -0.000140000 | -0.000663000 |
| 53 | 0.061363000  | 0.000160000  | 0.000603000  |
| 1  | -4.208584000 | -0.000658000 | -0.002302000 |

## NCF

|    |              |              |              |
|----|--------------|--------------|--------------|
| 6  | 3.883069000  | 0.086015000  | 0.000477000  |
| 6  | 2.684486000  | 0.043146000  | -0.000355000 |
| 53 | 0.691655000  | -0.022946000 | -0.000153000 |
| 1  | 4.946241000  | 0.124182000  | 0.001851000  |
| 9  | -4.787830000 | 0.077569000  | -0.000132000 |
| 6  | -3.531773000 | 0.005883000  | -0.000202000 |
| 7  | -2.389738000 | -0.059488000 | 0.001131000  |

NCNO<sub>2</sub>

|    |              |              |              |
|----|--------------|--------------|--------------|
| 6  | 4.688249000  | 0.019354000  | 0.033822000  |
| 6  | 3.489442000  | 0.010334000  | 0.018864000  |
| 53 | 1.498830000  | -0.005062000 | -0.008038000 |
| 1  | 5.752107000  | 0.026837000  | 0.049192000  |
| 6  | -2.806930000 | -0.005867000 | -0.011387000 |
| 7  | -1.665016000 | -0.014671000 | -0.027765000 |
| 7  | -4.239956000 | 0.005826000  | 0.008792000  |
| 8  | -4.763813000 | -1.073691000 | 0.017220000  |
| 8  | -4.746171000 | 1.093745000  | 0.015511000  |

NF<sub>3</sub>

|    |              |              |              |
|----|--------------|--------------|--------------|
| 7  | -2.345533000 | 0.007609000  | 0.000282000  |
| 9  | -2.872002000 | -0.936799000 | -0.809889000 |
| 9  | -3.009582000 | 1.120219000  | -0.382030000 |
| 9  | -2.919334000 | -0.278205000 | 1.189512000  |
| 6  | 4.099843000  | -0.058129000 | -0.001351000 |
| 6  | 2.901780000  | -0.025898000 | -0.000628000 |
| 53 | 0.914220000  | 0.026236000  | 0.000633000  |
| 1  | 5.163576000  | -0.086554000 | -0.002016000 |

N(NO<sub>2</sub>)<sub>3</sub>

|    |              |              |              |
|----|--------------|--------------|--------------|
| 7  | -1.440993000 | 0.001095000  | -0.000359000 |
| 7  | -1.982008000 | 0.072703000  | -1.400813000 |
| 8  | -1.442253000 | -0.697050000 | -2.119896000 |
| 8  | -2.837028000 | 0.871823000  | -1.600009000 |
| 7  | -1.985164000 | 1.174952000  | 0.765381000  |
| 8  | -2.836328000 | 0.943006000  | 1.559618000  |
| 8  | -1.451050000 | 2.185152000  | 0.457433000  |
| 7  | -1.972655000 | -1.252679000 | 0.636912000  |
| 8  | -2.823037000 | -1.830935000 | 0.043919000  |
| 8  | -1.431189000 | -1.486712000 | 1.662899000  |
| 6  | 4.988300000  | -0.002764000 | 0.000665000  |
| 6  | 3.789925000  | -0.000294000 | 0.000330000  |
| 53 | 1.802094000  | 0.003177000  | -0.000874000 |
| 1  | 6.052462000  | -0.004830000 | 0.000774000  |

PF<sub>3</sub>

|    |              |              |              |
|----|--------------|--------------|--------------|
| 15 | 2.344490000  | 0.011794000  | -0.004183000 |
| 9  | 3.062429000  | -0.515560000 | 1.279892000  |
| 9  | 3.202222000  | 1.302183000  | -0.208538000 |
| 9  | 3.079786000  | -0.895943000 | -1.042223000 |
| 6  | -4.459113000 | -0.068940000 | 0.015641000  |
| 6  | -3.261219000 | -0.031436000 | 0.007249000  |
| 53 | -1.272124000 | 0.028511000  | -0.006793000 |
| 1  | -5.522733000 | -0.101876000 | 0.023234000  |

**COMPLEXES WITH NH<sub>3</sub>**

GeH<sub>3</sub>I

|    |              |              |              |
|----|--------------|--------------|--------------|
| 32 | -1.957173000 | 0.002845000  | 0.001672000  |
| 53 | 0.565724000  | -0.003491000 | -0.002051000 |
| 1  | -2.437062000 | 1.056323000  | -1.013781000 |
| 1  | -2.435127000 | 0.358286000  | 1.421646000  |
| 1  | -2.442512000 | -1.402233000 | -0.399972000 |
| 7  | 3.886009000  | 0.005915000  | 0.003812000  |
| 1  | 4.237997000  | 0.397424000  | 0.868716000  |
| 1  | 4.247915000  | 0.567697000  | -0.756837000 |
| 1  | 4.272875000  | -0.924910000 | -0.091237000 |

GeH<sub>3</sub>Br

|    |             |             |             |
|----|-------------|-------------|-------------|
| 32 | 1.722132000 | 0.035528000 | 0.001464000 |
|----|-------------|-------------|-------------|

|    |              |              |              |
|----|--------------|--------------|--------------|
| 35 | -0.595942000 | -0.064105000 | -0.002751000 |
| 1  | 2.192251000  | 0.046476000  | -1.463836000 |
| 1  | 2.242893000  | -1.209138000 | 0.741550000  |
| 1  | 2.136561000  | 1.328069000  | 0.727068000  |
| 7  | -3.977938000 | 0.058632000  | 0.000432000  |
| 1  | -4.512872000 | -0.281420000 | -0.788774000 |
| 1  | -4.022492000 | 1.069977000  | -0.012786000 |
| 1  | -4.441022000 | -0.257637000 | 0.843192000  |

C<sub>6</sub>Me<sub>5</sub>Br

|    |              |              |              |
|----|--------------|--------------|--------------|
| 6  | 0.510082000  | 1.223861000  | -0.043088000 |
| 6  | -0.156145000 | -0.001238000 | -0.054882000 |
| 6  | 1.909095000  | 1.213386000  | 0.015103000  |
| 35 | -2.068660000 | -0.003935000 | -0.016221000 |
| 6  | 0.513261000  | -1.224622000 | -0.043040000 |
| 6  | 2.608112000  | 0.002327000  | -0.001271000 |
| 6  | 1.912224000  | -1.210550000 | 0.015257000  |
| 6  | -0.230113000 | -2.533205000 | -0.098782000 |
| 1  | -1.163608000 | -2.429256000 | -0.644743000 |
| 1  | 0.363792000  | -3.300473000 | -0.590444000 |
| 1  | -0.479115000 | -2.890809000 | 0.904436000  |
| 6  | 4.117450000  | 0.004296000  | -0.056582000 |
| 1  | 4.492753000  | -0.870297000 | -0.583552000 |
| 1  | 4.490456000  | 0.879816000  | -0.583641000 |
| 1  | 4.564561000  | 0.004933000  | 0.942275000  |
| 6  | 2.660036000  | 2.519065000  | 0.127121000  |
| 1  | 3.606380000  | 2.386739000  | 0.646589000  |
| 1  | 2.878247000  | 2.950415000  | -0.854595000 |
| 1  | 2.086317000  | 3.254440000  | 0.687267000  |
| 6  | -0.236438000 | 2.530653000  | -0.098833000 |
| 1  | 0.354499000  | 3.298466000  | -0.593265000 |
| 1  | -1.171146000 | 2.423825000  | -0.642110000 |
| 1  | -0.483376000 | 2.889328000  | 0.904517000  |
| 6  | 2.666577000  | -2.514237000 | 0.127603000  |
| 1  | 2.094970000  | -3.250771000 | 0.688390000  |
| 1  | 2.885488000  | -2.945546000 | -0.853971000 |
| 1  | 3.612778000  | -2.379205000 | 0.646623000  |
| 7  | -5.227655000 | 0.003988000  | 0.107788000  |
| 1  | -5.664635000 | 0.063153000  | -0.803534000 |
| 1  | -5.541594000 | 0.798859000  | 0.650619000  |

|   |              |              |             |
|---|--------------|--------------|-------------|
| 1 | -5.574940000 | -0.832220000 | 0.560702000 |
|---|--------------|--------------|-------------|

C<sub>6</sub>Me<sub>5</sub>Br

|    |              |              |              |
|----|--------------|--------------|--------------|
| 6  | 0.122787000  | 1.222366000  | -0.025385000 |
| 6  | -0.544346000 | -0.002299000 | -0.033495000 |
| 6  | 1.521497000  | 1.212848000  | 0.013883000  |
| 17 | -2.289872000 | -0.005599000 | -0.013417000 |
| 6  | 0.127285000  | -1.224505000 | -0.025386000 |
| 6  | 2.221757000  | 0.002787000  | -0.008766000 |
| 6  | 1.525939000  | -1.209850000 | 0.013911000  |
| 6  | -0.616697000 | -2.533157000 | -0.065180000 |
| 1  | -1.615322000 | -2.407699000 | -0.472091000 |
| 1  | -0.087731000 | -3.260795000 | -0.678936000 |
| 1  | -0.720687000 | -2.958665000 | 0.936898000  |
| 6  | 3.730241000  | 0.005638000  | -0.075445000 |
| 1  | 4.102927000  | -0.869105000 | -0.604231000 |
| 1  | 4.099566000  | 0.881785000  | -0.604278000 |
| 1  | 4.183573000  | 0.006546000  | 0.920657000  |
| 6  | 2.270545000  | 2.520677000  | 0.101356000  |
| 1  | 3.208603000  | 2.403559000  | 0.639923000  |
| 1  | 2.506224000  | 2.920277000  | -0.889821000 |
| 1  | 1.687890000  | 3.274211000  | 0.626736000  |
| 6  | -0.626002000 | 2.528277000  | -0.065257000 |
| 1  | -0.100047000 | 3.257623000  | -0.679578000 |
| 1  | -1.624363000 | 2.398998000  | -0.471617000 |
| 1  | -0.730995000 | 2.953801000  | 0.936712000  |
| 6  | 2.279694000  | -2.514962000 | 0.101548000  |
| 1  | 1.699698000  | -3.270496000 | 0.627005000  |
| 1  | 2.516805000  | -2.913849000 | -0.889574000 |
| 1  | 3.217303000  | -2.394424000 | 0.640129000  |
| 7  | -5.438923000 | 0.000798000  | 0.052543000  |
| 1  | -5.867979000 | 0.065679000  | -0.862115000 |
| 1  | -5.758671000 | 0.792384000  | 0.596718000  |
| 1  | -5.792703000 | -0.837160000 | 0.497061000  |
